# Supplementary material
Source: publisher figshare collection journal article supplement (https://sage.figshare.com/ndownloader/files/20502738)
Supplement: Supplementary file 1 [file 20502738]

**Supplementary materials: Variables examined for correlation with polypharmacy and overdosing**

| ITEMS                                                            | OPERATIONALIZATION                     |
|------------------------------------------------------------------|----------------------------------------|
| <i>30 PANSS-adopted items</i>                                    |                                        |
| PANSS-adopted at admission: Scale<br>Delusion                    | substantially, discretely, not present |
| PANSS-adopted at admission: Scale<br>Conceptual disorganization  | substantially, discretely, not present |
| PANSS-adopted at admission: Scale<br>Hallucinations              | substantially, discretely, not present |
| PANSS-adopted at admission: Scale<br>Hyperactivity               | substantially, discretely, not present |
| PANSS-adopted at admission: Scale<br>Grandiosity                 | substantially, discretely, not present |
| PANSS-adopted at admission: Scale<br>Suspiciousness/ persecution | substantially, discretely, not present |
| PANSS-adopted at admission: Scale<br>Hostility                   | substantially, discretely, not present |
| PANSS-adopted at admission: Scale Blunted<br>affect              | substantially, discretely, not present |
| PANSS-adopted at admission: Scale<br>Emotional withdrawal        | substantially, discretely, not present |
| PANSS-adopted at admission: Scale Poor<br>rapport                | substantially, discretely, not present |

|                                                                                   |                                        |
|-----------------------------------------------------------------------------------|----------------------------------------|
| PANSS-adopted at admission: Scale Passive/<br>apathetic social withdrawal         | substantially, discretely, not present |
| PANSS-adopted at admission: Scale<br>Difficulty in abstract thinking              | substantially, discretely, not present |
| PANSS-adopted at admission: Scale Lack of<br>spontaneity and flow of conversation | substantially, discretely, not present |
| PANSS-adopted at admission: Scale<br>Stereotyped thinking                         | substantially, discretely, not present |
| PANSS-adopted at admission: Scale Somatic<br>concern                              | substantially, discretely, not present |
| PANSS-adopted at admission: Scale Anxiety                                         | substantially, discretely, not present |
| PANSS-adopted at admission: Scale Guilt<br>feelings                               | substantially, discretely, not present |
| PANSS-adopted at admission: Scale Tension                                         | substantially, discretely, not present |
| PANSS-adopted at admission: Scale<br>Mannerisms and posturing                     | substantially, discretely, not present |
| PANSS-adopted at admission: Scale<br>Depression                                   | substantially, discretely, not present |
| PANSS-adopted at admission: Scale Motor<br>retardation                            | substantially, discretely, not present |
| PANSS at admission: Scale<br>Uncooperativeness                                    | substantially, discretely, not present |
| PANSS-adopted at admission: Scale Unusual<br>thought content                      | substantially, discretely, not present |

|                                                                       |                                        |
|-----------------------------------------------------------------------|----------------------------------------|
| PANSS-adopted at admission: Scale<br>Disorientation                   | substantially, discretely, not present |
| PANSS-adopted at admission: Scale Poor<br>attention                   | substantially, discretely, not present |
| PANSS-adopted at admission: Scale Lack of<br>judgement and insight    | substantially, discretely, not present |
| PANSS-adopted at admission: Scale<br>Disturbance of volition          | substantially, discretely, not present |
| PANSS-adopted at admission: Scale Poor<br>impulse control             | substantially, discretely, not present |
| PANSS-adopted at admission: Scale<br>Preoccupation                    | substantially, discretely, not present |
| PANSS-adopted at admission: Scale Active<br>social avoidance          | substantially, discretely, not present |
|                                                                       |                                        |
| <i>Other illness related variables &amp; behavior<br/>on the ward</i> |                                        |
| Suicidal ideation before forensic treatment                           | Dichotomous (yes/ no)                  |
| Suicidal ideation during forensic treatment                           | Dichotomous (yes/ no)                  |
| Suicide attempts during forensic treatment                            | Dichotomous (yes/ no)                  |
| Diagnosis of a personality disorder                                   | Dichotomous (yes/ no)                  |
| Sexually deviant behavior                                             | Dichotomous (yes/ no)                  |
| Complaints about staff on the ward                                    | Dichotomous (yes/ no)                  |
| Complaints about physicians on the ward                               | Dichotomous (yes/ no)                  |

|                                                                        |                                                                                       |
|------------------------------------------------------------------------|---------------------------------------------------------------------------------------|
| Constant breaking of rules on the ward                                 | Dichotomous (yes/ no)                                                                 |
| Time passed since first diagnosis of schizophrenia                     | continuous                                                                            |
| Endangerment of other individuals during forensic treatment            | Dichotomous (yes/ no)                                                                 |
| Insight into falseness of index offence                                | Dichotomous (yes/ no)                                                                 |
|                                                                        |                                                                                       |
| <i>Sociodemographic variables</i>                                      |                                                                                       |
| Country of birth                                                       | Inside EU/ outside EU                                                                 |
| Intelligence quotient (IQ)                                             | continuous                                                                            |
|                                                                        |                                                                                       |
| <i>Criminal history related variables</i>                              |                                                                                       |
| Number of entries in the federal central criminal registry             | continuous                                                                            |
| Number of convictions to imprisonment                                  | continuous                                                                            |
| Time passed since first entry in the federal central criminal registry | continuous                                                                            |
| Index offence                                                          | Homicide or attempted homicide, sexual abuse of children, rape or sexual abuse, arson |
|                                                                        |                                                                                       |
| <i>Treatment related variables</i>                                     |                                                                                       |
| Security level of the ward                                             | 4 different levels of security                                                        |
| Compulsory measures during treatment                                   | Dichotomous (yes/ no)                                                                 |
| Future legal prognosis                                                 | Favorable, sufficient, doubtful, unfavorable                                          |
